# Supplementary material for: Promoter methylation of PCDH10 by HOTAIR regulates the progression of gastrointestinal stromal tumors
Source: PubMed Central journal article supplement (PMC5342742; doi:10.18632/oncotarget.12171), 2016-09-21
Supplement: oncotarget-07-75307-s001.pdf [file oncotarget-07-75307-s001.pdf]

## Promoter methylation of PCDH10 by HOTAIR regulates the progression of gastrointestinal stromal tumors

### SUPPLEMENTARY TABLES

Supplementary Table S1: HOTAIR-induced PRC2 target gene expression in HOTAIR silenced-GIST cells

| GeneSymbol | GeneName                                          | Fold change (compared to siCT) |
|------------|---------------------------------------------------|--------------------------------|
| RPS6KA2    | ribosomal protein S6 kinase, 90kDa, polypeptide 2 | 1.041                          |
| JAM2       | junctional adhesion molecule 2                    | 1.154                          |
| PCDH10     | protocadherin 10                                  | 1.925                          |

**Supplementary Table S2: Cancer-related target gene expression in HOTAIR overexpressing GIST-T1 cell**

See Supplementary File 1
